# Supplementary material
Source: Springer Nature journal article supplement (https://www.springerprofessional.de/resource/supplementary/13677_2012_13_MOESM8_ESM.pdf/10743464)
Supplement: MOESM8 [file 10743464]

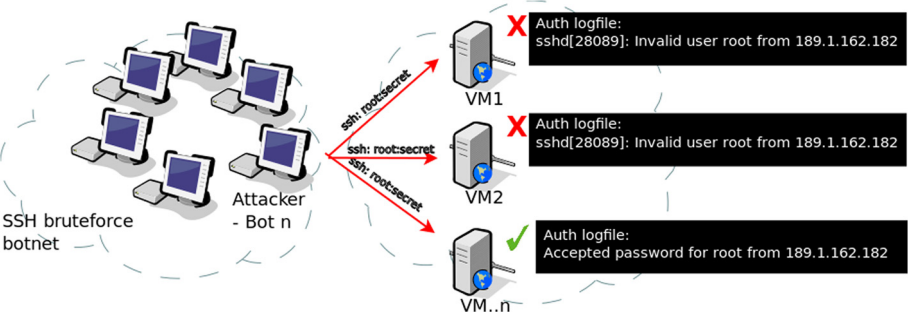

SSH brute-force  
botnet

Attacker  
- Bot n

ssh: root:secret

ssh: root:secret

ssh: root:secret

VM1

VM2

VM...n

X Auth logfile:  
sshd[28089]: Invalid user root from 189.1.162.182

X Auth logfile:  
sshd[28089]: Invalid user root from 189.1.162.182

✓ Auth logfile:  
Accepted password for root from 189.1.162.182
